# Supplementary material for: Surface-enhanced Raman spectroscopy for size-resolved microplastic detection in real-world samples using thiophenol labeling
Source: Royal Society of Chemistry journal article supplement (doi:10.1039/d5en00211g), 2025-01-01
Supplement: d5en00211g11.pdf [file d5en00211g11.pdf]

Electronic Supplementary Material

# Surface-Enhanced Raman Spectroscopy for Size-Resolved Microplastic Detection in Real-world Samples Using Thiophenol Labeling

Jayasree Kumar<sup>a</sup>, Arunima Jinachandran<sup>a</sup>, Mounika Renduchintala<sup>a</sup>, Venugopal Rao Soma<sup>b,c</sup>, Vijayakumar Shanmugam<sup>d</sup>, Shaik Imamvali<sup>e</sup>, Sreenivasulu Tupakula<sup>e</sup>, and Rajapandiyan Panneerselvam<sup>\*a</sup>

- 1 Raman Research Laboratory (RARE Lab), Department of Chemistry, SRM University-AP, Andhra Pradesh, Amaravati, 522240, India
- 2 Advanced Centre of Research in High Energy Materials (ACRHEM), DRDO Industry Academia – Centre of Excellence (DIA-COE), University of Hyderabad, India
- 3 School of Physics, University of Hyderabad, Hyderabad, 500046, India
- 4 Institute of Nano Science and Technology, Mohali, India
- 5 Department of Electronics and Communication Engineering, SRM University-AP Andhra Pradesh, 522240, India

**\*Corresponding author**

E-mail address: [rajapandiyan.p@srmmap.edu.in](mailto:rajapandiyan.p@srmmap.edu.in) (Rajapandiyan Panneerselvam)

## Table of contents

### Figure S1.

Scanning electron microscopy image of AgNPs decorated on the filter paper (AgNPs@Filter paper). (b) Histogram size distribution for ~150 random AgNPs across various SEM images with an average size distribution of  $\sim 43 \pm 5$  nm.

### Figure S2.

(a) UV-vis spectra of Ag colloids dispersed in various solvents: deionized (DI) water, methanol, and a methanol-toluene mixture, (b) SERS spectra of 1 mM thiophenol adsorbed on Ag colloids dispersed in the solvents: DI water, methanol, and methanol-toluene mixture.

### Figure S3.

(a) SERS spectra of 1 mM thiophenol adsorbed on AgNPs@Filter paper substrates, demonstrating the evaporation time from 30 min to 300 min. (b) Corresponding SERS signal at  $1066\text{ cm}^{-1}$ .

### Figure S4.

(a) SERS spectra of 1 mM thiophenol adsorbed on AgNPs@Filter paper substrates, demonstrating long-term stability over 14 days. The substrates were sealed and stored at  $3\text{ }^{\circ}\text{C}$ . (b) Corresponding SERS signal at  $1066\text{ cm}^{-1}$ .

### Table S1.

Raman peak assignment table for thiophenol, rhodamine 6G, and malachite green.

### Figure S5.

Scanning electron microscopy images of AgNPs@Filter paper incubated with different concentrations of PS microplastic.

### Figure S6.

(a) UV-vis spectra of toluene and PS microplastics of varying sizes ( $250\text{ }\mu\text{m}$  and  $2.1\text{ mm}$ ) at a concentration of  $1\text{ mg/mL}$  dispersed in toluene, (b) SERS spectra of PS ( $250\text{ }\mu\text{m}$  and  $2.1\text{ mm}$ ) at different concentrations ( $0 - 0.3\text{ mg/mL}$ ) analyzed on AgNPs@Filter paper substrate using  $1\text{ mM}$  thiophenol, (c) corresponding bar graph at  $1066\text{ cm}^{-1}$ .

### Figure S7.

(a) SERS spectra of various concentrations ( $0 - 0.9\text{ mg/mL}$ ) of microplastic mixtures (PS, PP, and PVC) in

equal ratio incubated on an AgNPs@Filter paper substrate were analyzed using 1 mM thiophenol, (b) corresponding linear plot at  $1066\text{ cm}^{-1}$ .

**Table S2.**

Water quality assessment (DI water, saltwater, and lake water).

**Figure S8.**

(a) SERS spectra of 0.09 mg/mL PS microplastics (250  $\mu\text{m}$  and 2.1 mm) spiked in lake water and salt samples, incubated on an AgNPs@Filter paper substrate, and analyzed using 1 mM thiophenol, (b) corresponding bar graph at  $1066\text{ cm}^{-1}$ .

**Figure S9.**

Bar diagram illustrating the selectivity of microplastic detection in the presence of ten different potential coexisting contaminants (organic pollutants (1 mg/mL): PFOSA, glyphosate, and thiram; inorganic ions (1mg/mL): chromium, phosphate, and nitrite; inorganic colloids and bio-organisms: clay (TDS 18.06), algae (OD 0.4), and bacteria (OD 0.6); aromatic compound (1mg/mL): bisphenol A) commonly found in real samples, with corresponding Raman intensities at  $1066\text{ cm}^{-1}$ . Error bars represent the standard deviations of triplicate measurements.

**Figure S10.**

Electric field intensity distributions of AgNPs with 2 nm (a) and 10 nm (b) gaps in the vertical plane ( $x-z$ ), showing the confinement of the localized electric field between the gaps of two adjacent nanoparticles.

## Supplementary 1

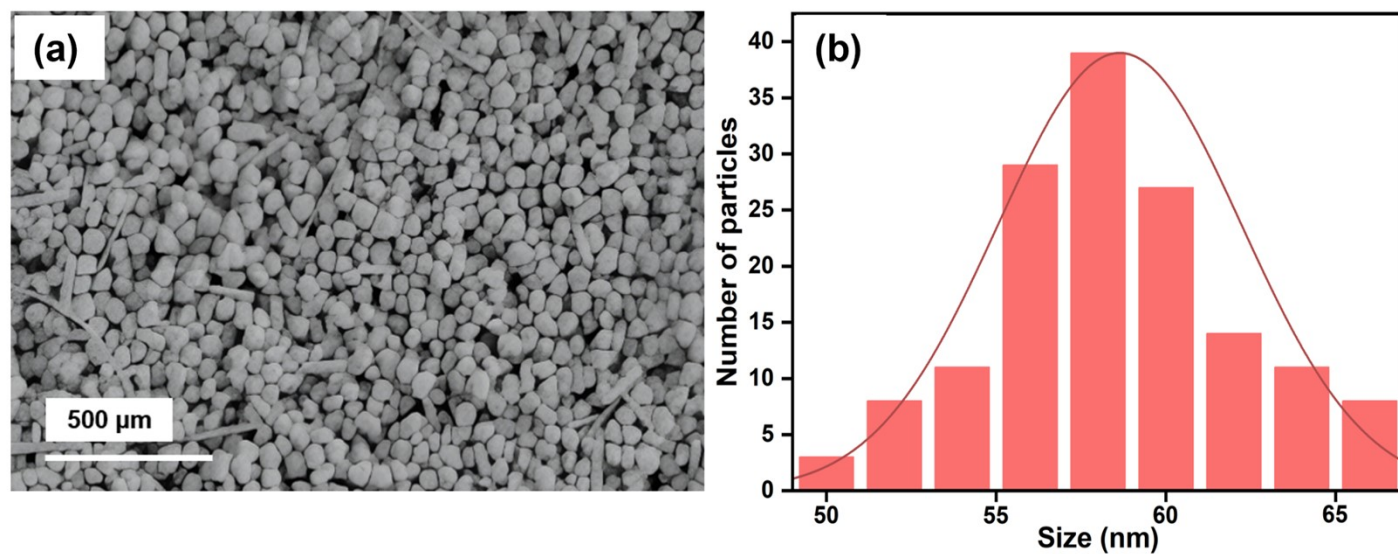

**Fig. S1.** Scanning electron microscopy image of AgNPs decorated on the filter paper (AgNPs@Filter paper). (b) Histogram size distribution for ~150 random AgNPs across various SEM images with an average size distribution of  $\sim 57 \pm 5$  nm.

## Supplementary 2

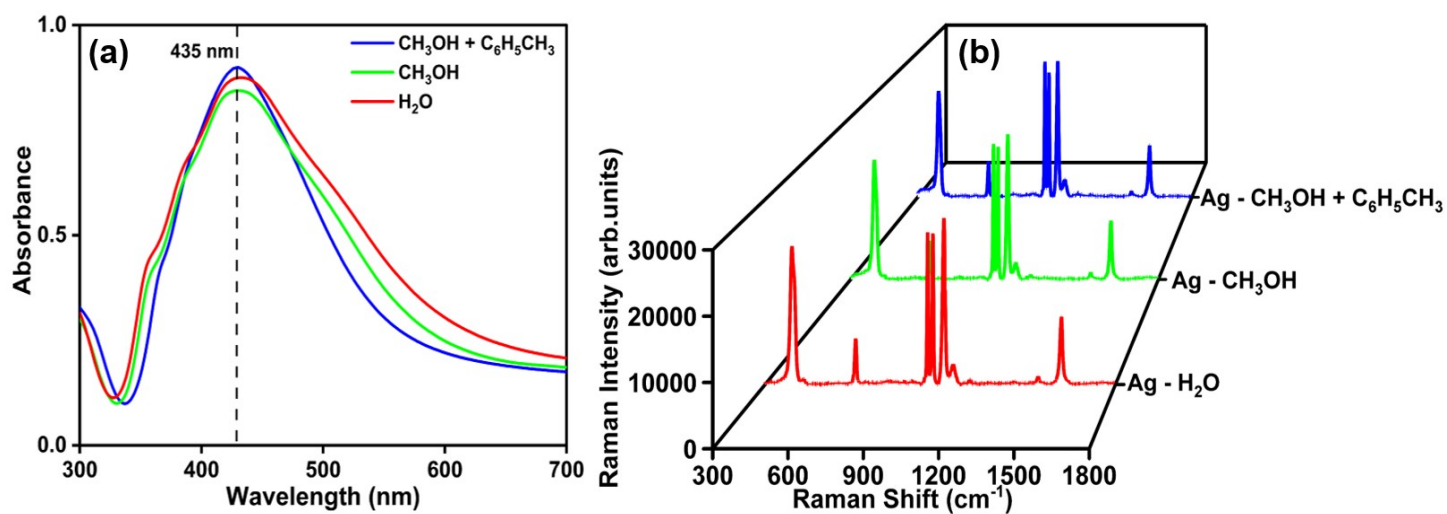

**Fig. S2.** (a) UV-vis spectra of Ag colloids dispersed in various solvents: deionized (DI) water, methanol, and a methanol-toluene mixture, (b) SERS spectra of 1mM thiophenol adsorbed on Ag colloids dispersed in the solvents: DI water, methanol, and methanol-toluene mixture.

### Supplementary 3

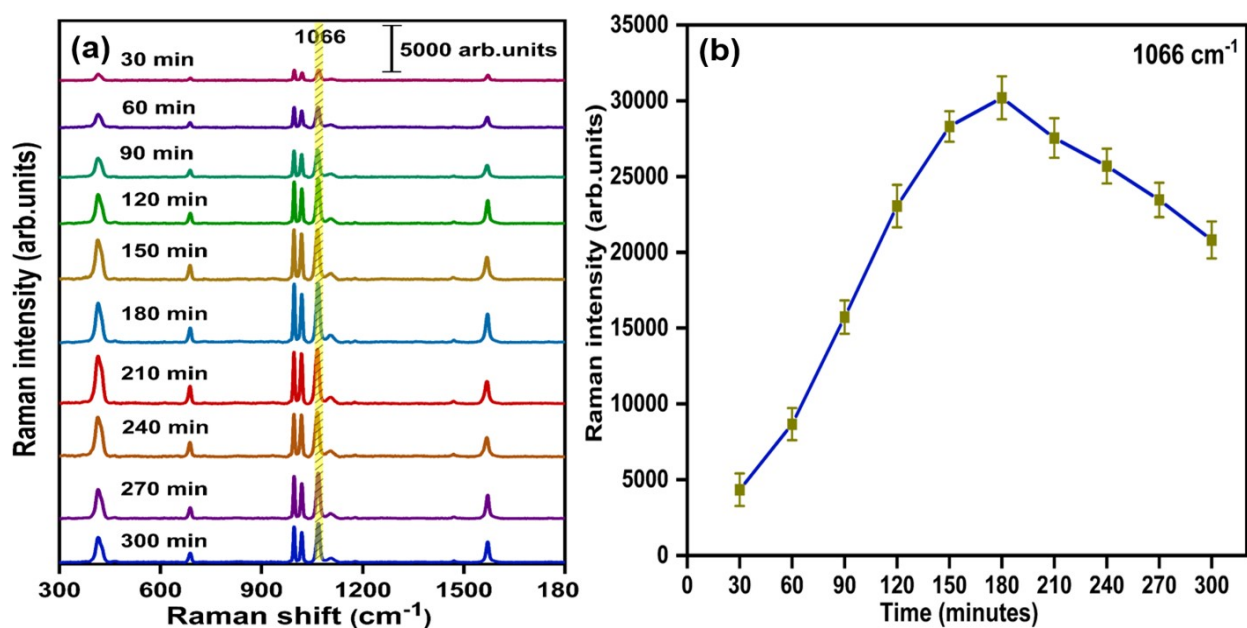

**Fig. S3.** (a) SERS spectra of 1 mM thiophenol adsorbed on AgNPs@Filter paper substrates, demonstrating the evaporation time from 30 min to 300 min. (b) Corresponding SERS signal at 1066  $\text{cm}^{-1}$ .

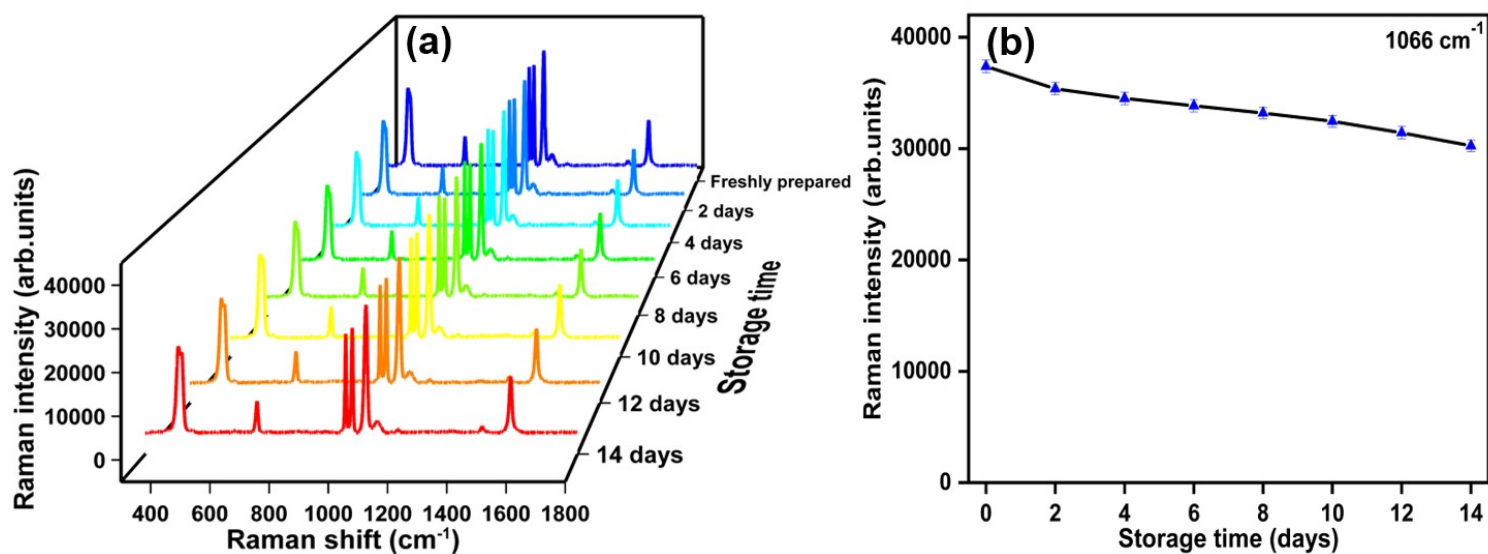

#### Supplementary 4

**Fig. S4.** (a) SERS spectra of 1 mM thiophenol adsorbed on AgNPs@Filter paper substrates, demonstrating long-term stability over 14 days. The substrates were sealed and stored at 3 °C. (b) Corresponding SERS signal at 1066 cm<sup>-1</sup>.

## Supplementary 5

**Table. S1.** Peak assignments of thiophenol, rhodamine 6G, and malachite green.

| Thiophenol - Raman shift<br>(cm <sup>-1</sup> ) | Assignment                                        |
|-------------------------------------------------|---------------------------------------------------|
| 415                                             | $\nu(\text{C-S})$ C-S stretching                  |
| 690                                             | $\nu(\text{C-C})$ Ring breathing                  |
| 1000                                            | $\nu(\text{C-C})$ Ring breathing                  |
| 1020                                            | $\delta(\text{C-H})$ C-H in-plane bending         |
| 1066                                            | $\delta(\text{C-H})$ C-H in-plane bending         |
| 1575                                            | $\nu(\text{C-C})$ C-C stretching (in phenyl ring) |

$\nu$  - Stretching vibration

$\delta$  - In-plane bending



| Rhodamine 6G - Raman shift<br>(cm <sup>-1</sup> ) | Assignment                                |
|---------------------------------------------------|-------------------------------------------|
| 610                                               | $\nu$ (C-C-C) C-C-C Ring in-plane bending |
| 770                                               | $\gamma$ (C-H) C-H Out-of-plane bending   |
| 1180                                              | $\delta$ (C-H) C-H In-plane bending       |
| 1307                                              | $\nu$ (C-C) Aromatic C-C stretching       |
| 1358                                              | $\nu$ (C-C) C-C stretching                |
| 1509                                              | $\nu$ (C-C) Aromatic C-C stretching       |
| 1651                                              | $\nu$ (C=C) C=C stretching                |

$\nu$  - Stretching vibration

$\delta$  - In-plane bending

$\gamma$  - Out-plane bending

| Malachite green - Raman shift<br>(cm <sup>-1</sup> ) | Assignment                                    |
|------------------------------------------------------|-----------------------------------------------|
| 435                                                  | $\delta(\text{ring})$ Ring deformation        |
| 526                                                  | $\delta(\text{C-C-N})$ C-C-N bending          |
| 793                                                  | $\gamma(\text{C-H})$ C-H Out-of-plane bending |
| 920                                                  | $\nu(\text{C-N})$ C-N stretching              |
| 1171                                                 | $\delta(\text{C-H})$ C-H In-plane bending     |
| 1220                                                 | $\delta(\text{C-H})$ C-H bending              |
| 1298                                                 | $\nu(\text{C-N})$ C-N stretching              |
| 1390                                                 | $\nu(\text{N-Ph})$ N-phenyl stretching        |
| 1587                                                 | $\nu(\text{C-C})$ C-C Ring stretching         |
| 1615                                                 | $\nu(\text{C-C})$ C-C Ring stretching         |

$\nu$  - Stretching vibration

$\delta$  - In-plane bending

$\gamma$  - Out-plane bending

## Supplementary 6

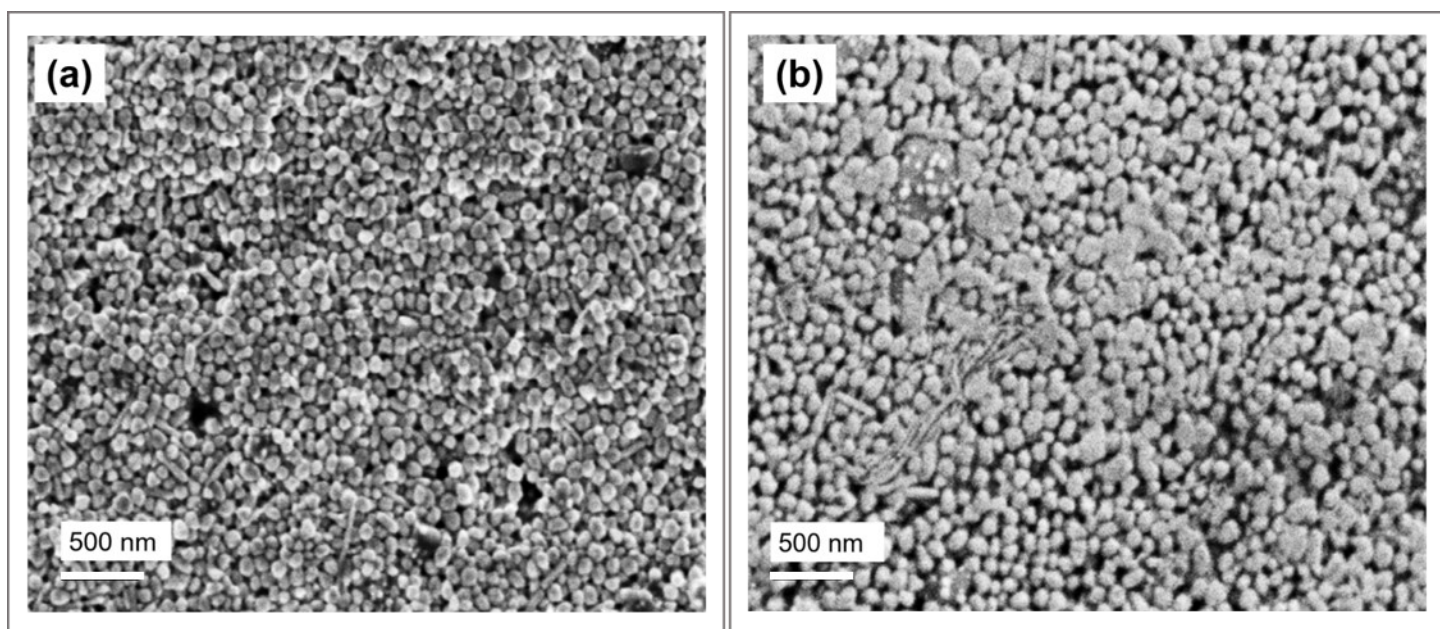

**Fig. S5.** (a) and (b) Scanning electron microscopic images of AgNPs@Filter paper incubated with concentrations of 0.1 mg/mL and 1 mg/mL of PS microplastic.

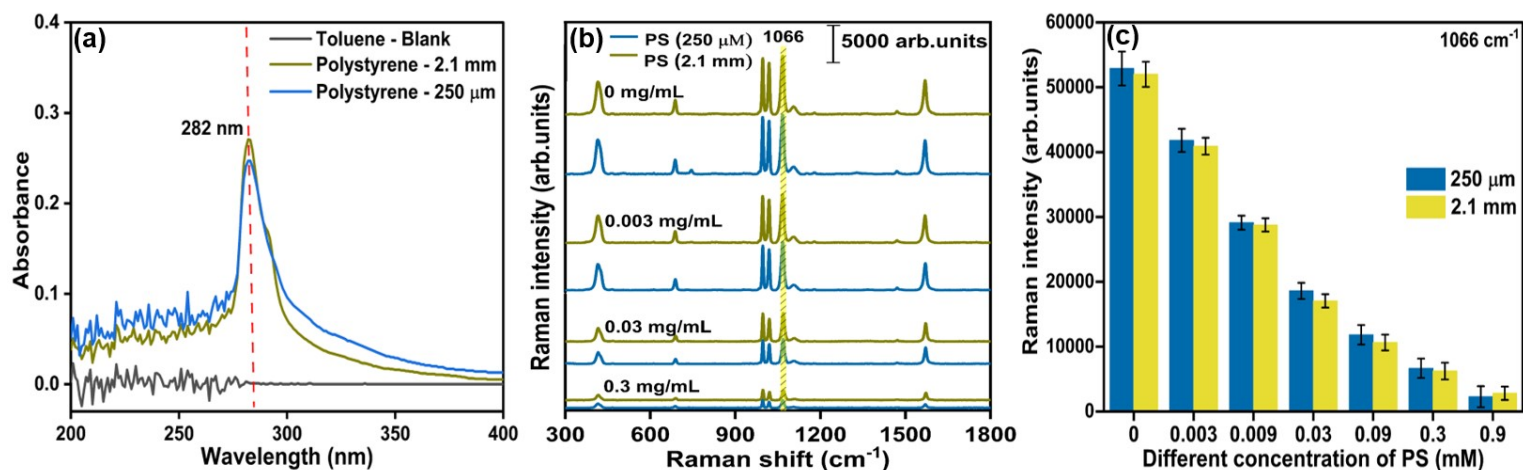

### Supplementary 7

**Fig. S6.** (a) UV-vis spectra of toluene and PS microplastics of varying sizes (250  $\mu\text{m}$  and 2.1 mm) at a concentration of 1 mg/mL dispersed in toluene, (b) SERS spectra of PS (250  $\mu\text{m}$  and 2.1 mm) at different concentrations (0 - 0.3 mg/mL) analyzed on AgNPs@Filter paper substrate using 1 mM thiophenol, (c) corresponding bar graph at 1066  $\text{cm}^{-1}$ .

## Supplementary 8

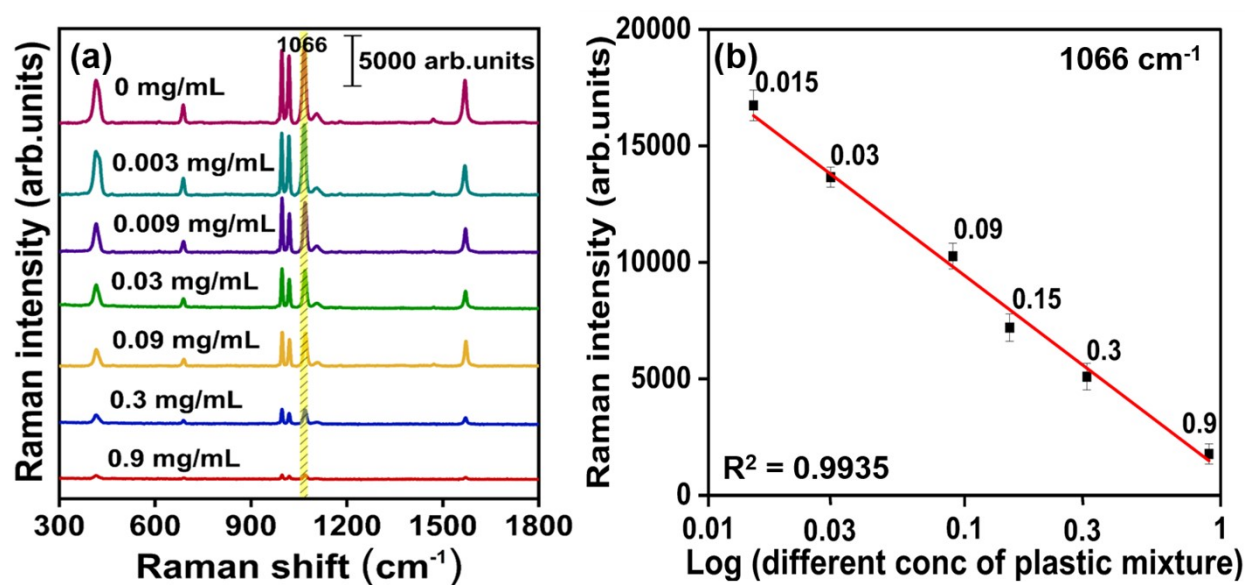

**Fig. S7.** (a) SERS spectra of various concentrations (0 - 0.9 mg/mL) of microplastic mixtures (PS, PP, and PVC) in equal ratios incubated on an AgNPs@Filter paper substrate were analyzed using 1 mM thiophenol, (b) corresponding linear plot at 1066 cm<sup>-1</sup>.

## Supplementary 9

**Table. S2.** Water quality parameters for DI, saltwater (salt dissolved in water), and lake water.

| Water quality parameters (unit)                              | DI<br>water | Saltwater | Lake<br>water |
|--------------------------------------------------------------|-------------|-----------|---------------|
| <b>pH</b>                                                    | 8.86        | 6.94      | 7.04          |
| <b>Conductivity</b><br>( $\mu\text{S/cm}$ )                  | 7.35        | 57,758    | 1,276.3       |
| <b>Resistivity</b><br>( $\Omega \text{ cm}$ )                | 1,36,176    | 17.31     | 783.51        |
| <b>Density</b><br>( $\text{g/cm}^3$ )                        | 1.00        | 1.03      | 1.00          |
| <b>Salinity</b><br>(PSU)                                     | 0.00        | 38.51     | 0.62          |
| <b>ORP (Oxidation reduction potential)</b><br>(mV)           | 137.1       | 125.9     | 105.5         |
| <b>RDO (Rugged dissolved oxygen) concentration</b><br>(mg/L) | 7.57        | 6.58      | 7.94          |
| <b>TDS (Total dissolved solids)</b>                          | 0.00        | 36.99     | 0.80          |

## Supplementary 10

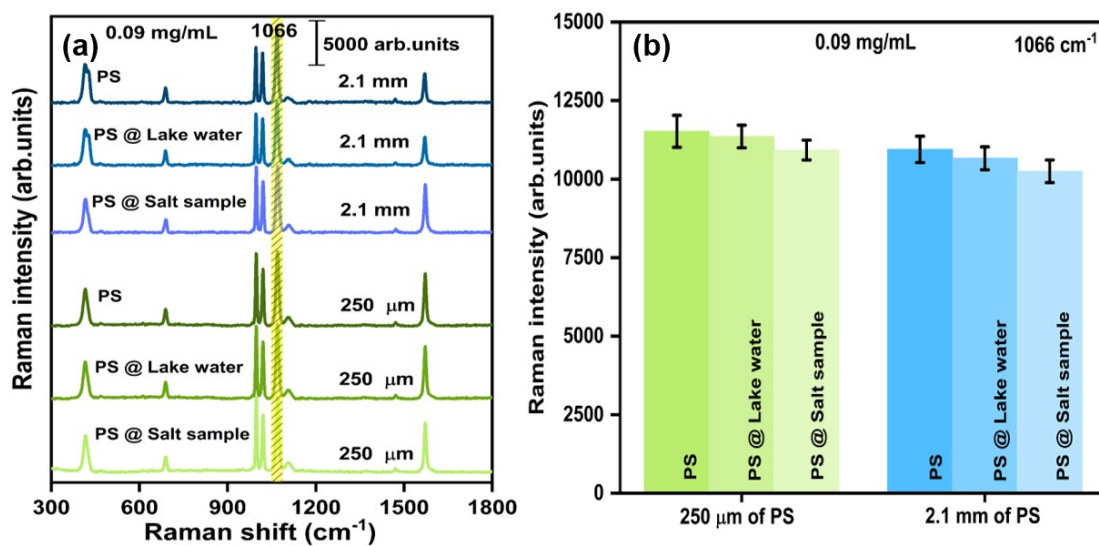

**Fig. S8.** (a) SERS spectra of 0.09 mg/mL PS microplastics (250  $\mu\text{m}$  and 2.1 mm) spiked in lake water and salt samples, incubated on an AgNPs@Filter paper substrate, and analyzed using 1 mM thiophenol, (b) corresponding bar graph at 1066  $\text{cm}^{-1}$ .

## Supplementary 11

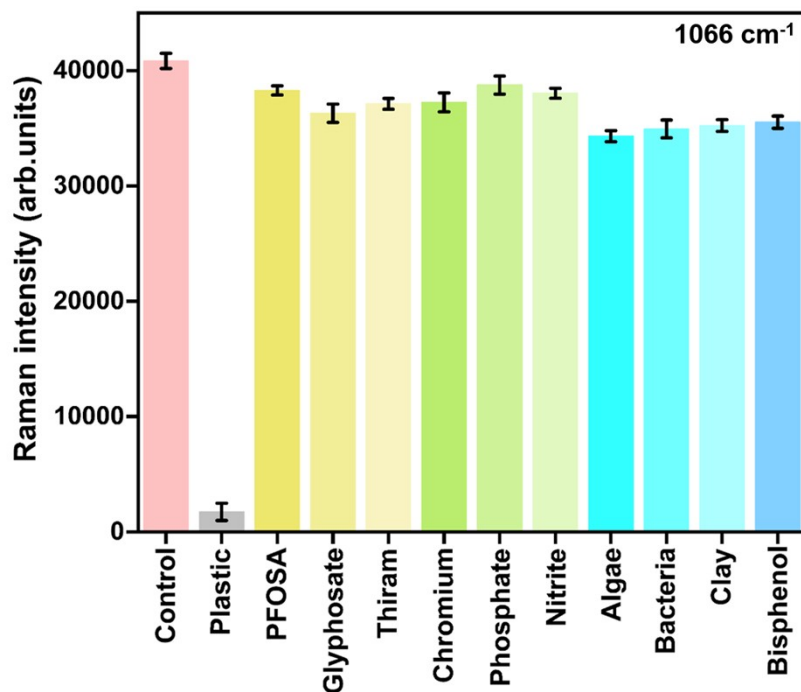

**Fig. S9.** Bar diagram illustrating the selectivity of microplastic detection in the presence of ten different potential coexisting contaminants (organic pollutants (1 mg/mL): PFOSA, glyphosate, and thiram; inorganic ions (1 mg/mL): chromium, phosphate, and nitrite; inorganic colloids and bio-organisms: clay (TDS 18.06), algae (OD 0.4), and bacteria (OD 0.6); aromatic compound (1 mg/mL): bisphenol A) commonly found in real samples, with corresponding Raman intensities at  $1066\text{ cm}^{-1}$ . Error bars represent the standard deviations of triplicate measurements.

Plastic – Polypropylene (PP)

PFOSA – Perfluorooctane sulfonamide



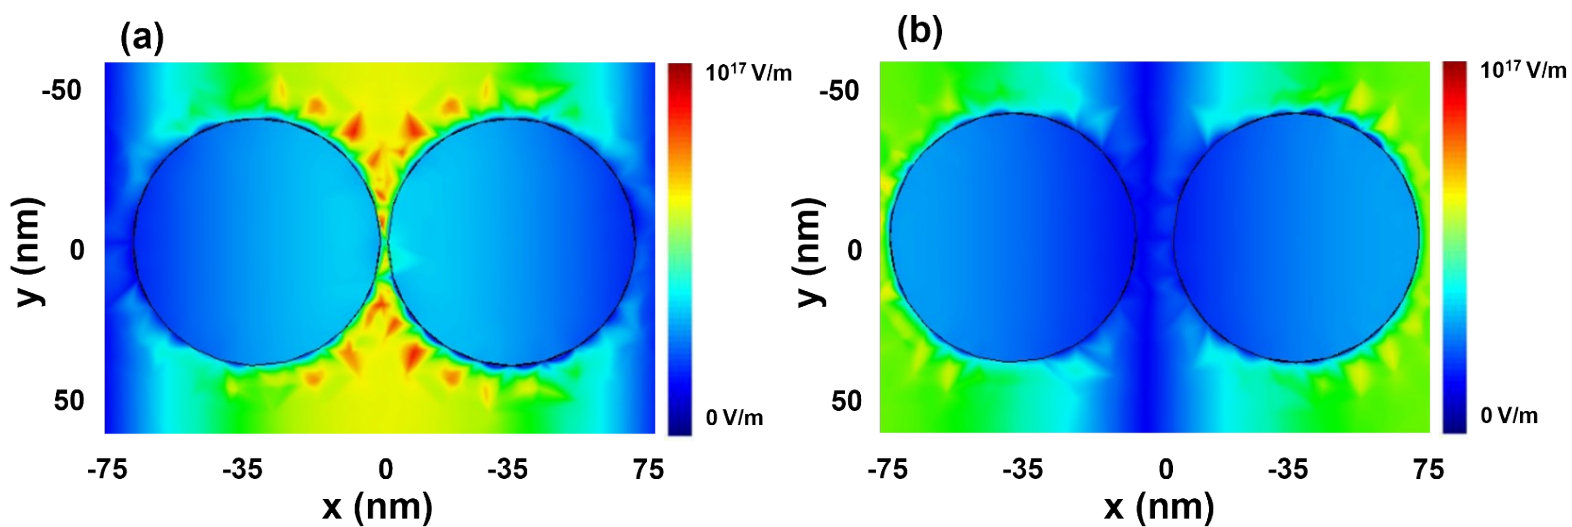

### Supplementary 12

**Fig. S10.** Electric field intensity distributions of AgNPs with 2 nm (a) and 10 nm (b) gaps in the vertical plane (x-z), showing the confinement of the localized electric field between the gaps of two adjacent nanoparticles.
