# Supplementary figures and images for: Surface-enhanced Raman spectroscopy for size-resolved microplastic detection in real-world samples using thiophenol labeling
Source: Royal Society of Chemistry journal article supplement (doi:10.1039/d5en00211g), 2025-01-01

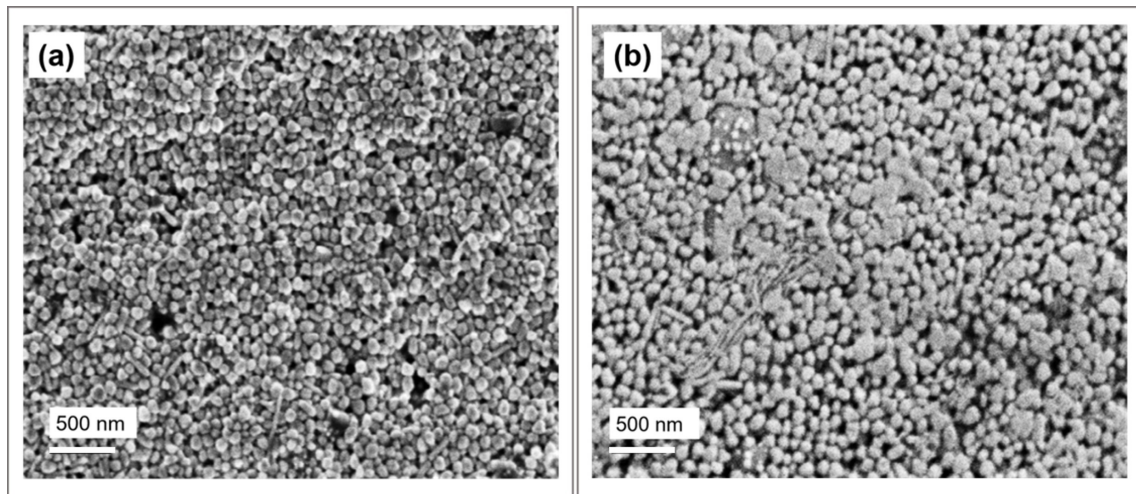

Supplement: d5en00211g6.pdf [file d5en00211g6.pdf]
